# Supplementary material for: Electron transfer in tetramethylbiphosphinine complexes of Cp*2Yb and Cp*2Sm
Source: Royal Society of Chemistry journal article supplement (doi:10.1039/c6nj00527f), 2016-01-01
Supplement: c6nj00527f1.pdf [file c6nj00527f1.pdf]

Supporting Information for the manuscript

## **Electron Transfer in Tetramethylbiphosphinine Complexes of $\text{Cp}^*_2\text{Yb}$ and $\text{Cp}^*_2\text{Sm}$**

**Arnaud Jaoul, Carine Clavaguéra,\* and Grégory Nocton\***

LCM, CNRS, Ecole polytechnique, Université Paris-Saclay, 91128  
Palaiseau, France

**Figure S1:**  $^1\text{H}$  NMR of **1** at room temperature in toluene- $\text{d}_8$ . \* are for solvents (toluene) and impurities (grease).

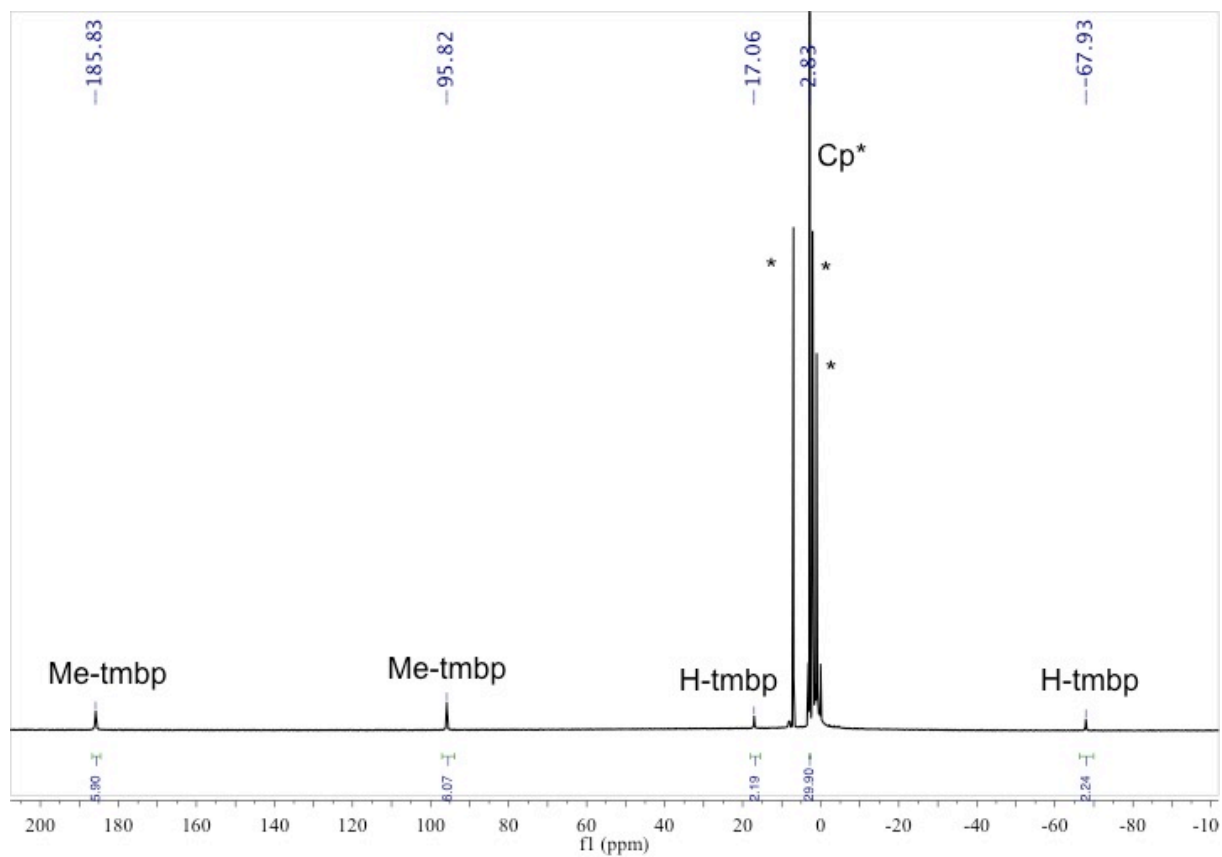

**Figure S2:**  $^1\text{H}$  NMR of **2** at room temperature in toluene- $\text{d}_8$ . \* are for solvents (toluene) and impurities (grease).

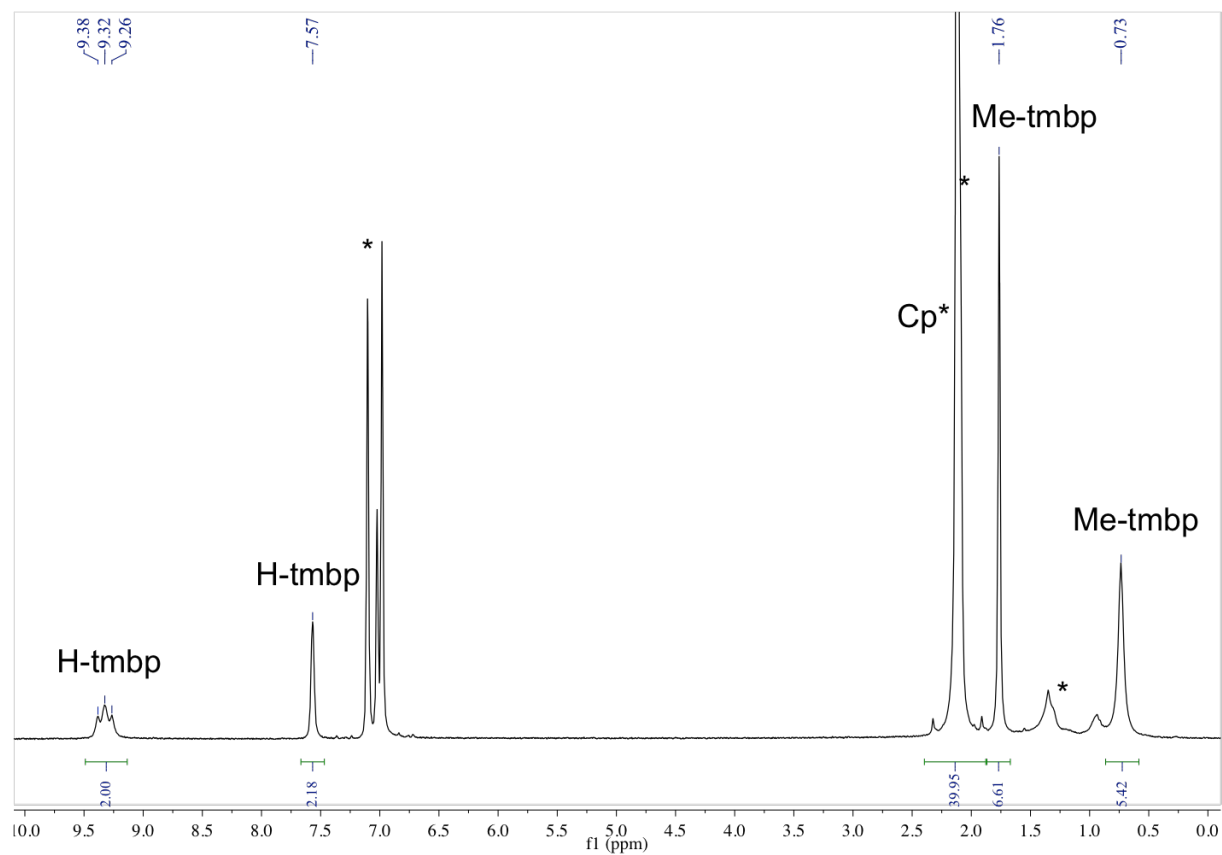

**Figure S3:**  $^1\text{H}$  NMR of **2** at room temperature in  $\text{thf-d}_8$ . \* are for solvents (thf and benzene) and and impurities (grease).

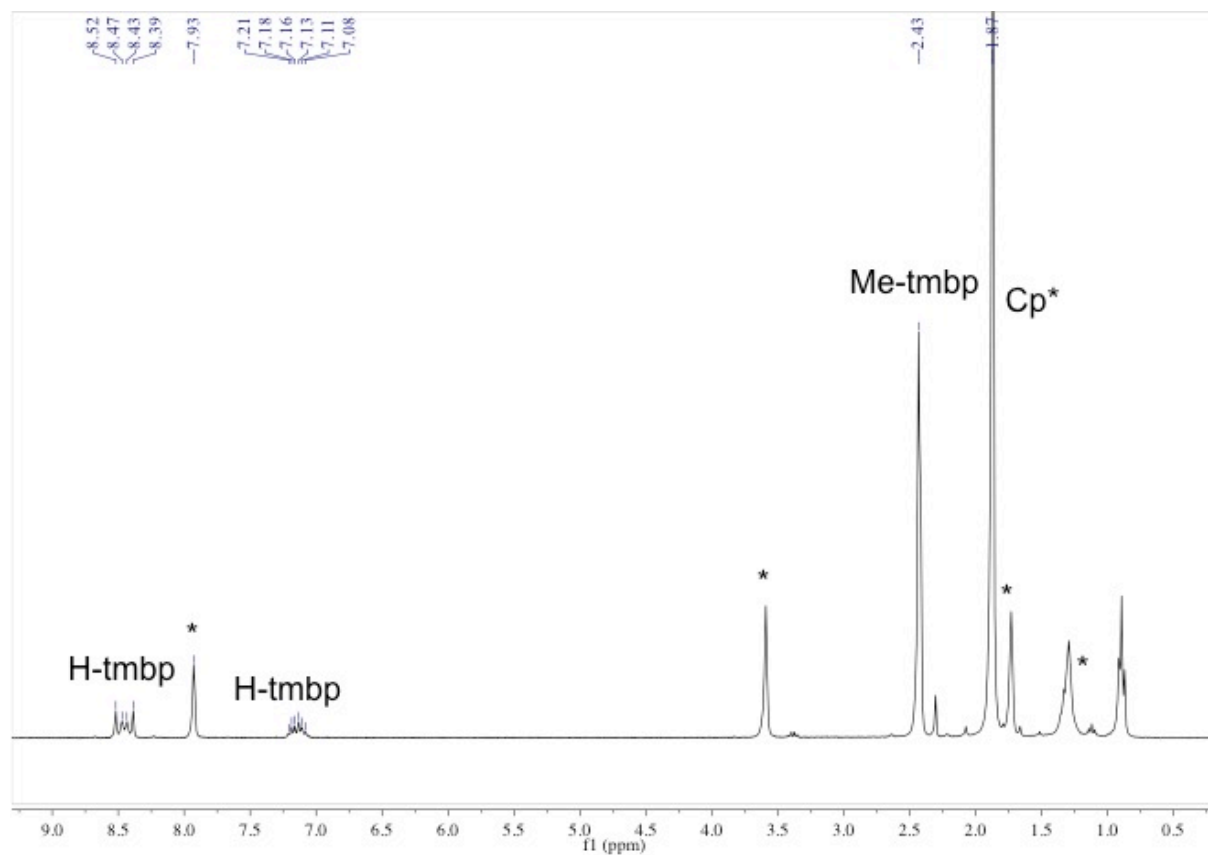

**Figure S4:**  $^{13}\text{C}$  NMR of **2** at room temperature in toluene- $\text{d}_8$ . The rather low concentration in toluene- $\text{d}_8$  did not allow observing all resonances after one weekend of acquiring the spectrum.

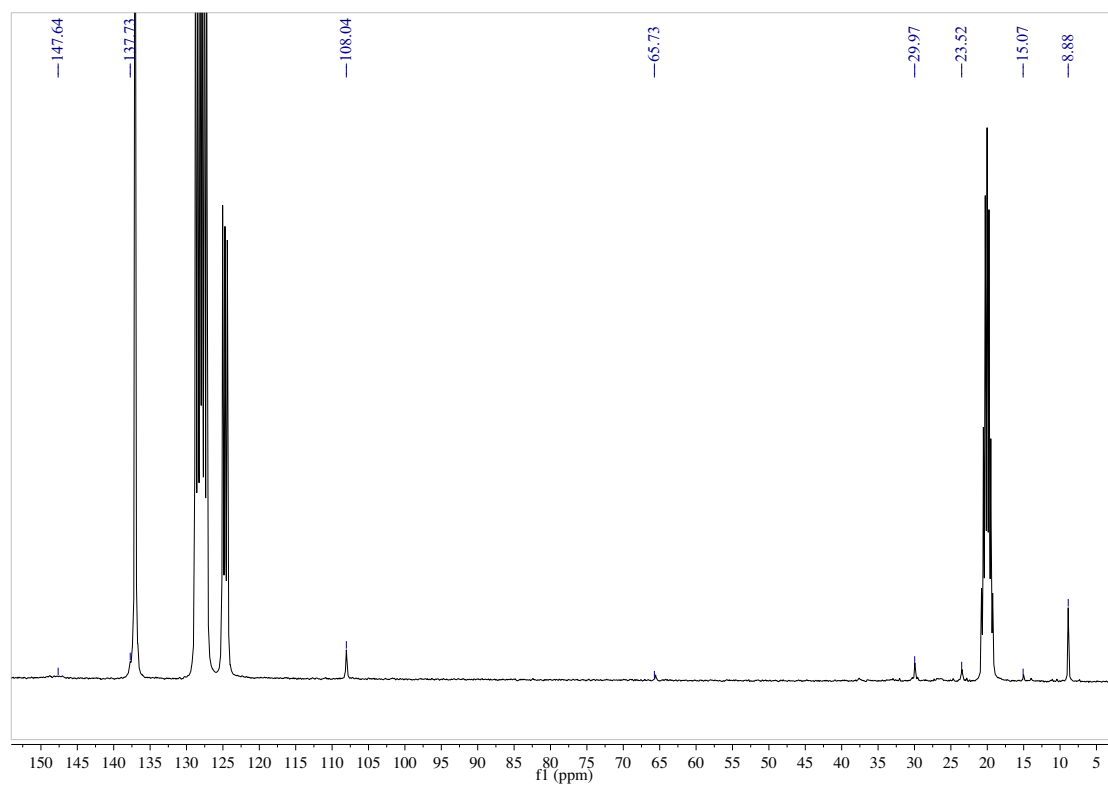

**Figure S5:** UV-Vis spectrum of **2** recorded in toluene at room temperature.

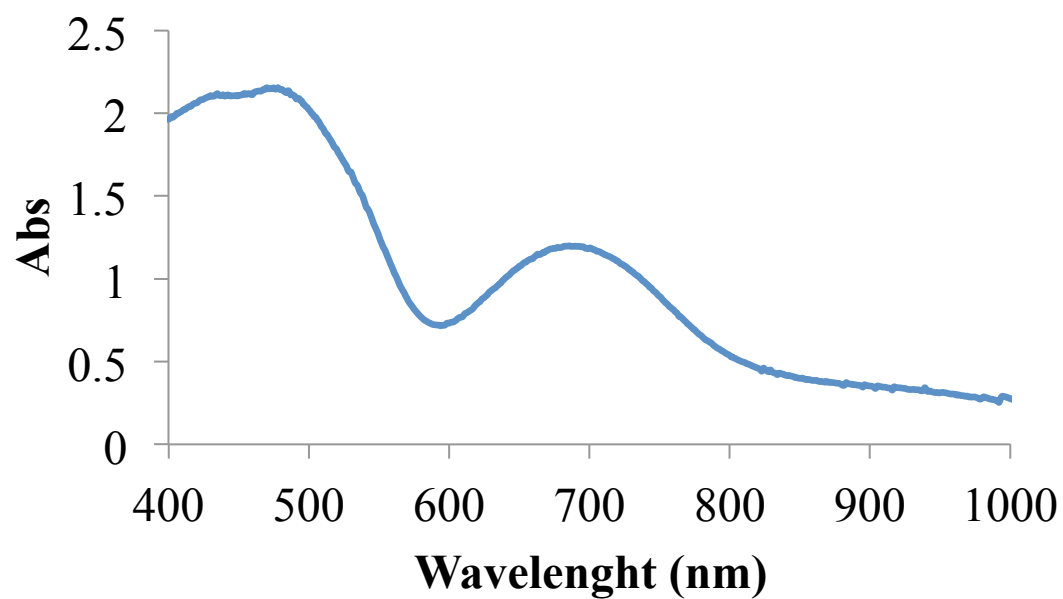

**Figure S6:** Temperature dependent magnetic data for **1**.  $\chi$  vs T is given as unfilled red dots,  $\mu_{\text{eff}}$  vs. T as filled blue dots.

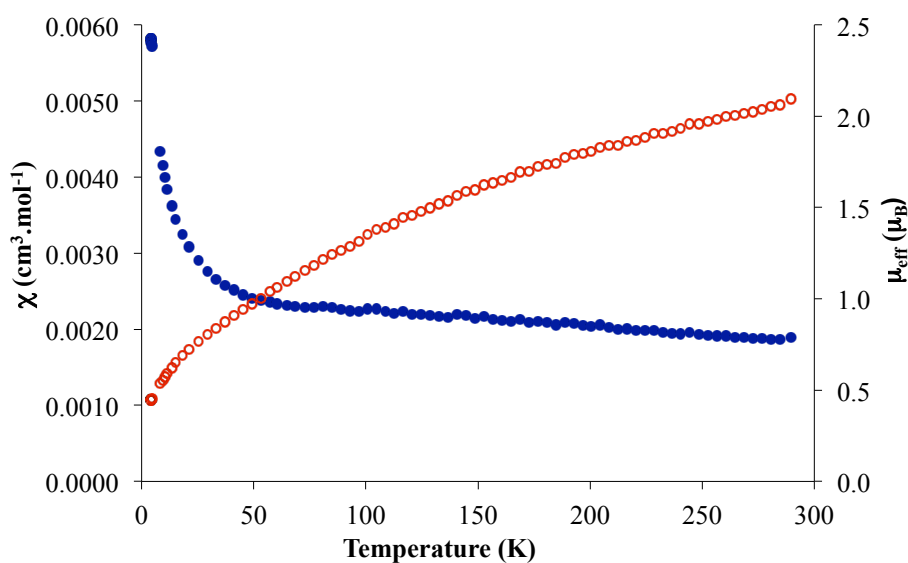

**Figure S7:** Energy profile as a function of the PCCP angle for both Sm and Yb complexes at the PBE-D3/SVP level.

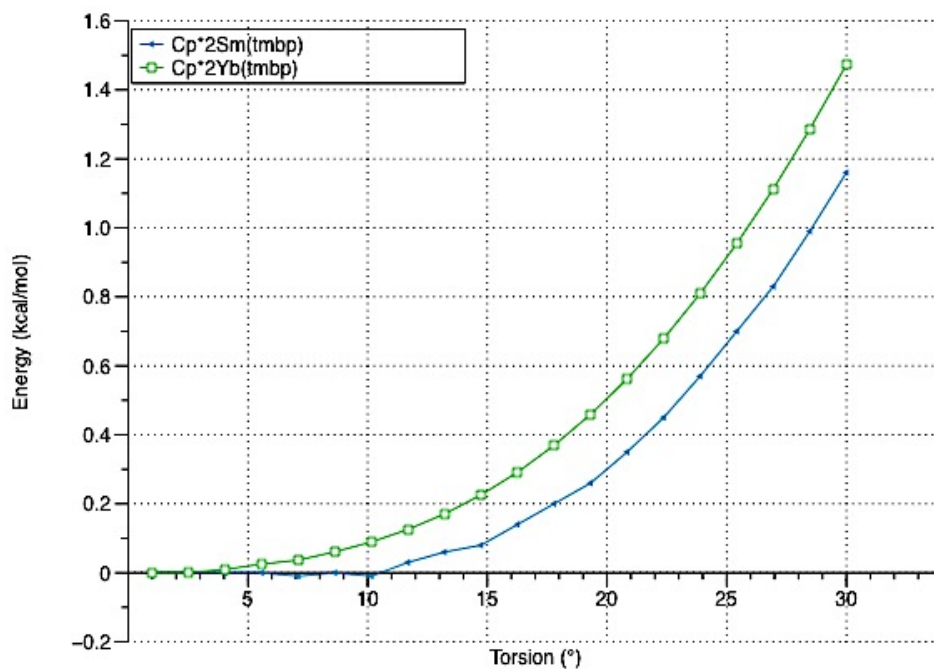

The single-point energy calculations were performed at the DFT/PBE-D3/SVP level of theory with the ORCA 3.03 package.<sup>1,2</sup> Scalar relativistic effects were taken into account using ZORA Hamiltonian.

**Table S1.** Crystallographic parameters for **1** and **2**.

|                                                           | [Cp* <sub>2</sub> Sm(tmbp)] ( <b>1</b> )          | [ Cp* <sub>2</sub> Yb(tmbp)] ( <b>2</b> )         |
|-----------------------------------------------------------|---------------------------------------------------|---------------------------------------------------|
| Formula                                                   | C <sub>34</sub> H <sub>46</sub> P <sub>2</sub> Sm | C <sub>34</sub> H <sub>46</sub> P <sub>2</sub> Yb |
| Crystal size (mm)                                         | 0.6 x 0.06 x 0.03                                 | 0.16x0.14x0.12                                    |
| cryst system                                              | Monoclinic                                        | triclinic                                         |
| space group                                               | P 21/c                                            | P -1                                              |
| volume (Å <sup>3</sup> )                                  | V = 3098.5(5)                                     | V = 1526.9(2)                                     |
| <i>a</i> (Å)                                              | <i>a</i> = 15.389(1)                              | <i>a</i> = 9.821(1)                               |
| <i>b</i> (Å)                                              | <i>b</i> = 11.081(1)                              | <i>b</i> = 10.697(1)                              |
| <i>c</i> (Å)                                              | <i>c</i> = 18.832(1)                              | <i>c</i> = 15.776(1)                              |
| <i>a</i> (deg)                                            | 90.00                                             | 77.407(1)                                         |
| <i>b</i> (deg)                                            | 105.234(1)                                        | 74.304(1)                                         |
| <i>g</i> (deg)                                            | 90.00                                             | 75.918(1)                                         |
| <i>Z</i>                                                  | 4                                                 | 2                                                 |
| formula weight (g/mol)                                    | 667                                               | 689.69                                            |
| density (calcd) (g cm <sup>-3</sup> )                     | 1.43                                              | 1.500                                             |
| absorption coefficient (mm <sup>-1</sup> )                | 2.02                                              | 3.188                                             |
| F(000)                                                    | 1368                                              | 700                                               |
| temp (K)                                                  | 150(1)                                            | 150(1)                                            |
| diffractometer <sup>a</sup>                               | SMART APEX                                        | SMART APEX                                        |
| θ range for data collection (deg)                         | 2.24 to 26.37                                     | 2.84 to 27.48                                     |
| transmission range                                        | 0.865 - 0.941                                     | 0.6295 - 0.7009                                   |
| absorption correction                                     | Multi-scan                                        | Multi-scan                                        |
| total no. reflections                                     | 15409                                             | 12166                                             |
| unique reflections [R <sub>int</sub> ]                    | 6266 [0.072]                                      | 6658 [0.053]                                      |
| final R <sup>b</sup> indices [ <i>I</i> > 2σ( <i>I</i> )] | R = 0.062, R <sub>w</sub> = 0.1152                | R = 0.0490, R <sub>w</sub> = 0.1101               |
| R indices (all data)                                      | R = 0.0904, R <sub>w</sub> = 0.1300               | R = 0.0590, R <sub>w</sub> = 0.1175               |
| largest diff. peak and hole (e.Å <sup>-3</sup> )          | 0.85 and -0.81                                    | 2.054 and -1.355                                  |
| GooF                                                      | 1.06                                              | 1.084                                             |

**Figure S8:** ORTEP and labeling scheme for **1**. Thermal ellipsoids are at 50%.

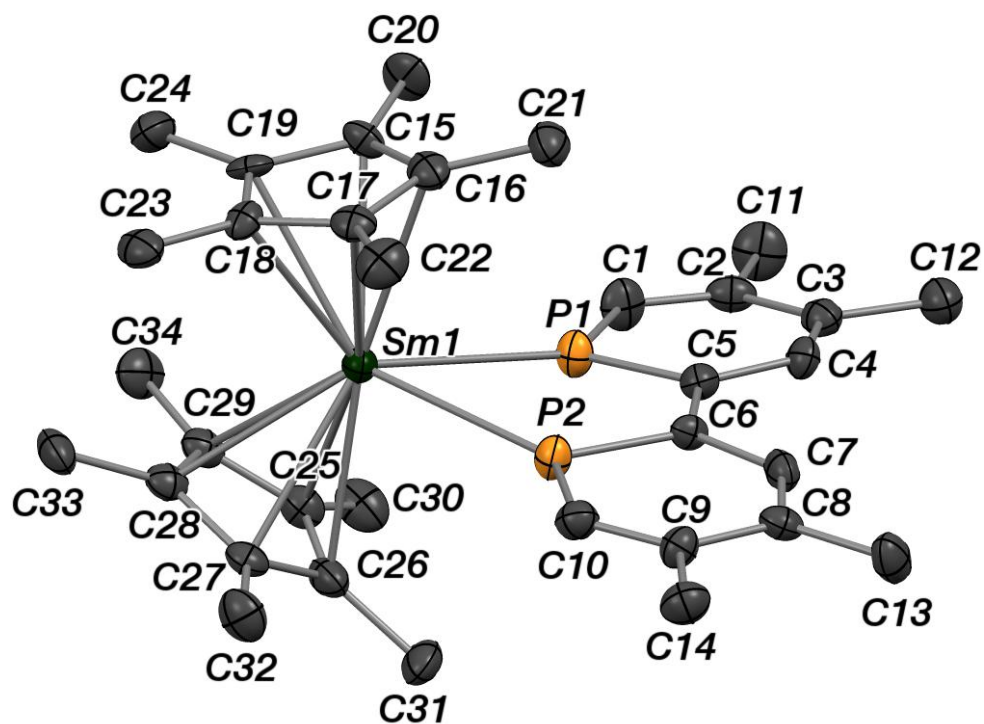

**Figure S9:** ORTEP and labeling scheme for **2**. Thermal ellipsoids are at 50%.

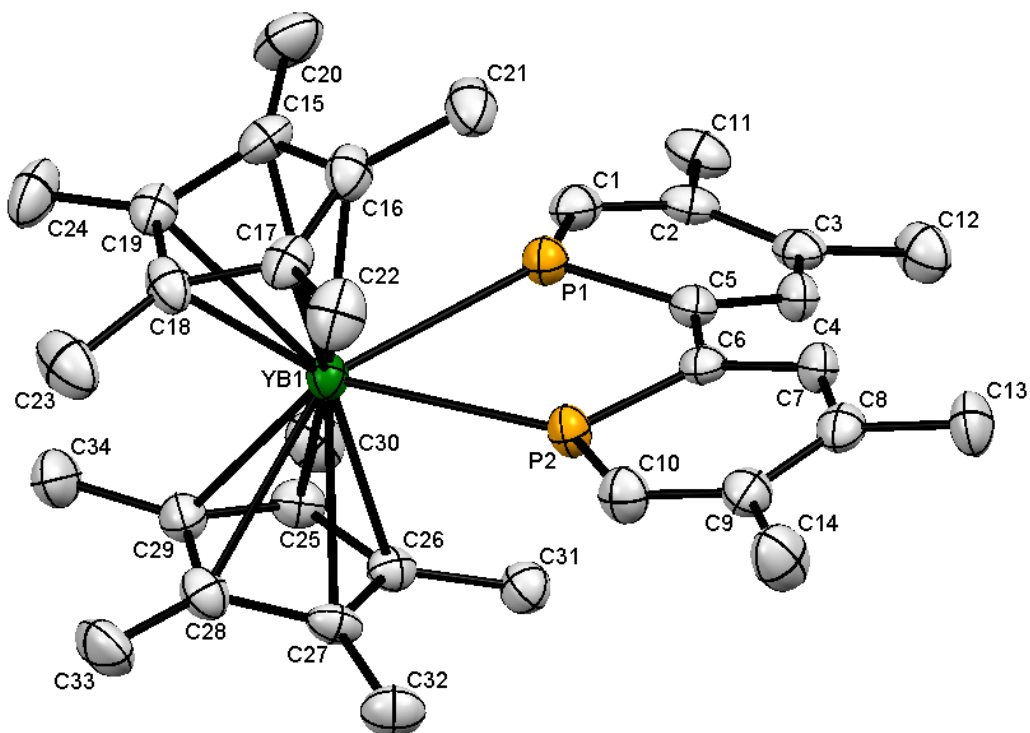



**References:**

1. Neese, F. (2012) The ORCA program system, Wiley Interdiscip. Rev.: Comput. Mol. Sci., 2, 73–78 .
2. Pantazis, D. A.; Neese, F. (2009) All-Electron Scalar Relativistic Basis Sets for the Lanthanides, J. Chem. Theory Comput., 5, 2229–2238.
